# Supplementary material
Source: PubMed Central journal article supplement (PMC6346332)
Supplement: 815717_App_1_online_supp.pdf [file 815717_App_1_online_supp.pdf]

## Appendix 1:

### List of pharmacy practice topics and authors

| Topic                                                                        | Author                              |
|------------------------------------------------------------------------------|-------------------------------------|
| 1 Pharmacist prescribing (including common ailments)                         | Lisa McCarthy                       |
| 2 Pharmacists as immunizers/injectors in Ontario                             | Nancy Waite                         |
| 3 Diabetes as an exemplar for chronic disease management                     | Lori MacCallum                      |
| 4 Opioid stewardship and caring for patients with chronic pain               | Feng Chang                          |
| 5 Medication review                                                          | Lisa Dolovich                       |
| 6 Quality improvement / change management in pharmacy                        | Sherilyn Houle (with Lisa McCarthy) |
| 7 eHealth including workflows that maximize the meaningful use of technology | Kelly Grindrod                      |
| 8 Substance use disorders                                                    | Beth Sproule                        |
| 9 Deprescribing                                                              | Barb Farrell                        |
| 10 Integration of pharmacy technicians into community pharmacy practice      | Zubin Austin                        |

Appendix to: Dolovich L, et al. Pharmacy in the 21st century: enhancing the impact of the profession of pharmacy on people's lives in the context of health care trends, evidence and policies. *Can Pharm J* (Ott) 2019;152(1). DOI: 10.1177/1715163518815717.
